# Supplementary material
Source: Springer Nature journal article supplement (https://www.springermedizin.de/resource/supplementary/13075_2009_2584_MOESM4_ESM.pdf/9692424)
Supplement: MOESM4 [file 9692424]

**Table S4** List of 116 genes differentially expressed at early RA (eRA) *versus* Controls (C)

| uniqID | IMAGE Id | UGCluster      | Name                                                    | Symbol  | eRA Group mean | C Group mean | Fold change | P value |
|--------|----------|----------------|---------------------------------------------------------|---------|----------------|--------------|-------------|---------|
| 269    | 194954   | Hs.151411      | Transcribed locus                                       |         | 0.586          | 0.007        | 88.765      | <1E-04  |
| 337    | 115506   | Hs.337766      | Ribosomal protein L18a                                  | RPL18A  | 1.334          | -0.050       | -26.883     | <1E-04  |
| 409    | 115772   | Data not found | Data not found                                          |         | 0.456          | -0.062       | -7.373      | <1E-04  |
| 793    | 84418    | Hs.238996      | Transcribed locus                                       |         | 0.493          | -0.113       | -4.360      | <1E-04  |
| 1099   | 84101    | Hs.318894      | G protein-coupled receptor 126                          | GPR126  | 0.460          | -0.006       | -75.176     | <1E-04  |
| 1126   | 81796    | Hs.1360        | Cytochrome P450, family 2, subfamily B6                 | CYP2B6  | 0.386          | -0.047       | -8.207      | <1E-04  |
| 1155   | 113265   | Hs.355708      | Transcribed locus                                       |         | 0.479          | -0.028       | -17.139     | <1E-04  |
| 1163   | 109718   | Data not found | Data not found                                          |         | 0.478          | -0.137       | -3.492      | <1E-04  |
| 1549   | 83383    | Hs.469593      | Data not found                                          |         | 0.423          | -0.109       | -3.894      | <1E-04  |
| 1604   | 110243   | Hs.567242      | Data not found                                          |         | 2.733          | -0.001       | -2083.262   | <1E-04  |
| 1630   | 83045    | Data not found | Data not found                                          |         | 0.611          | -0.052       | -11.810     | <1E-04  |
| 1663   | 37354    | Hs.188757      | Potassium channel tetramerisation domain                | KCTD20  | 0.378          | -0.068       | -5.554      | <1E-04  |
| 1677   | 113347   | Hs.111903      | Fc fragment of IgG, receptor, transporter, alpha        | FCGRT   | 0.489          | -0.081       | -6.068      | <1E-04  |
| 1715   | 122131   | Hs.246112      | Activating signal cointegrator 1 complex                | ASCC3L1 | 0.362          | 0.008        | 44.839      | <1E-04  |
| 1756   | 78051    | Hs.154078      | Lipopolysaccharide binding protein                      | LBP     | 0.547          | -0.093       | -5.860      | <1E-04  |
| 1794   | 111825   | Hs.443417      | Misshapen-like kinase 1 (zebrafish)                     | MINK1   | 0.515          | -0.006       | -87.636     | <1E-04  |
| 1876   | 113779   | Hs.472492      | Placenta-specific 4                                     | PLAC4   | 0.368          | -0.189       | -1.945      | <1E-04  |
| 1948   | 116040   | Hs.431550      | Mitogen-activated protein kinase kinase kinase kinase 4 | MAP4K4  | -0.900         | 0.236        | -3.810      | <1E-04  |
| 2060   | 197077   | Hs.408909      | Golgi phosphoprotein 3 (coat-protein)                   | GOLPH3  | 0.548          | -0.131       | -4.176      | <1E-04  |
| 2155   | 115318   | Hs.563417      | CDNA FLJ45287 fis, clone BRHIP3002124                   |         | 0.244          | -0.159       | -1.538      | <1E-04  |
| 2224   | 78956    | Hs.567289      | Data not found                                          |         | 0.494          | 0.012        | 40.370      | <1E-04  |
| 2380   | 116522   | Hs.272168      | Serine incorporator 3                                   | SERINC3 | -0.367         | -0.070       | 5.233       | <1E-04  |
| 2438   | 196350   | Hs.482103      | Transcribed locus                                       |         | 0.478          | -0.078       | -6.099      | <1E-04  |
| 2690   | 191801   | Data not found | Data not found                                          |         | 0.801          | -0.074       | -10.875     | <1E-04  |
| 2962   | 83074    | Data not found | Data not found                                          |         | 0.492          | -0.042       | -11.727     | <1E-04  |
| 2969   | 195547   | Hs.136829      | Regulatory factor X, 3                                  | RFX3    | 0.504          | -0.018       | -28.725     | <1E-04  |
| 3071   | 109302   | Data not found | Data not found                                          |         | 0.342          | -0.023       | -15.012     | <1E-04  |
| 3077   | 193757   | Hs.119825      | Spectrin, alpha, erythrocytic 1 (elliptocytosis 2)      | SPTA1   | 0.322          | -0.040       | -8.065      | <1E-04  |

|      |        |                      |                                                      |         |        |        |         |        |
|------|--------|----------------------|------------------------------------------------------|---------|--------|--------|---------|--------|
| 3293 | 196032 | Hs.434973            | Glycophorin A (MNS blood group)                      | GYPA    | 0.513  | -0.060 | -8.551  | <1E-04 |
| 3302 | 196827 | Hs.546286            | Ribosomal protein S3                                 | RPS3    | 0.599  | -0.015 | -38.776 | <1E-04 |
| 3311 | 195299 | Hs.504877            | Rho GDP dissociation inhibitor (GDI) beta            | ARHGDIB | 0.296  | -0.118 | -2.498  | <1E-04 |
| 3405 | 113539 | Data not found       | Data not found                                       |         | 0.438  | -0.032 | -13.698 | <1E-04 |
| 3425 | 123106 | Hs.434961            | Ataxin 1                                             | ATXN1   | 0.502  | -0.117 | -4.306  | <1E-04 |
| 3462 | 346009 | In multiple clusters | Data not found                                       |         | -1.926 | -0.117 | 16.499  | <1E-04 |
| 3550 | 241837 | Hs.552968            | Data not found                                       |         | 0.462  | -0.137 | -3.380  | <1E-04 |
| 3711 | 234985 | Hs.53454             | Topoisomerase (DNA) II binding protein 1             | TOPBP1  | 0.498  | 0.032  | 15.789  | <1E-04 |
| 3999 | 212698 | Hs.409794            | C-type lectin domain family 1, member B              | CLEC1B  | 0.465  | -0.073 | -6.367  | <1E-04 |
| 4015 | 198503 | Hs.474584            | Transcribed locus                                    |         | 0.223  | -0.231 | -0.964  | <1E-04 |
| 4161 | 240009 | Hs.356794            | Ribosomal protein S24                                | RPS24   | 0.436  | -0.133 | -3.269  | <1E-04 |
| 4182 | 417033 | Hs.34780             | Doublecortex; lissencephaly, X-linked (doublecortin) | DCX     | -1.053 | -0.080 | 13.172  | <1E-04 |
| 4440 | 230056 | Data not found       | Data not found                                       |         | 0.529  | -0.038 | -13.827 | <1E-04 |
| 4867 | 417468 | Hs.59134             | Transmembrane protein 188                            | TMEM188 | 0.328  | -0.067 | -4.901  | <1E-04 |
| 5079 | 235116 | Data not found       | Data not found                                       |         | 0.588  | -0.065 | -9.093  | <1E-04 |
| 5167 | 202414 | Hs.221498            | Data not found                                       |         | 0.342  | -0.039 | -8.800  | <1E-04 |
| 5187 | 213585 | Hs.521124            | Mitochondrial ribosomal protein S28                  | MRPS28  | 0.510  | -0.251 | -2.034  | <1E-04 |
| 5336 | 22328  | Hs.512914            | NMDA receptor regulated 1-like                       | NARG1L  | 0.775  | 0.052  | 15.040  | <1E-04 |
| 5345 | 114544 | Hs.14601             | Hematopoietic cell-specific Lyn substrate 1          | HCLS1   | 0.399  | -0.102 | -3.921  | <1E-04 |
| 5500 | 200938 | Hs.158209            | Data not found                                       |         | 0.505  | 0.017  | 30.457  | <1E-04 |
| 5501 | 207970 | Data not found       | Data not found                                       |         | 0.838  | -0.149 | -5.620  | <1E-04 |
| 5626 | 200604 | Hs.268787            | Ariadne homolog                                      | ARIH1   | 0.531  | -0.035 | -15.138 | <1E-04 |
| 5696 | 110385 | Hs.512619            | Thymidine kinase 2, mitochondrial                    | TK2     | 0.255  | -0.148 | -1.722  | <1E-04 |
| 5829 | 415630 | Hs.387794            | Transcribed locus                                    |         | -0.314 | -0.034 | 9.342   | <1E-04 |
| 5878 | 201365 | Data not found       | Data not found                                       |         | 0.339  | 0.032  | 10.520  | <1E-04 |
| 5887 | 202531 | Hs.212088            | Epoxide hydrolase 2, cytoplasmic                     | EPHX2   | 0.651  | -0.059 | -10.946 | <1E-04 |
| 5955 | 415621 | Hs.71465             | Squalene epoxidase                                   | SQLE    | -0.594 | -0.045 | 13.243  | <1E-04 |
| 6265 | 202704 | Hs.109655            | Sex comb on midleg-like 1 (Drosophila)               | SCML1   | 0.640  | 0.015  | 43.595  | <1E-04 |
| 6515 | 113522 | Hs.484551            | Hypothetical protein MGC5370                         | MGC5370 | 0.747  | 0.028  | 26.659  | <1E-04 |
| 6542 | 23108  | Hs.270775            | Transcribed locus                                    |         | 0.564  | -0.072 | -7.840  | <1E-04 |

|       |         |                      |                                                     |           |        |        |          |        |
|-------|---------|----------------------|-----------------------------------------------------|-----------|--------|--------|----------|--------|
| 6572  | 203767  | Data not found       | Data not found                                      |           | 0.306  | -0.095 | -3.231   | <1E-04 |
| 6820  | 430313  | Hs.379414            | Malignant fibrous histiocytoma amplified sequence 1 | MFHAS1    | 1.644  | -0.046 | -36.096  | <1E-04 |
| 6979  | 200743  | Hs.80756             | Betaine-homocysteine methyltransferase              | BHMT      | 0.623  | -0.718 | -0.867   | <1E-04 |
| 7073  | 343218  | Hs.509791            | Enhancer of rudimentary homolog (Drosophila)        | ERH       | 0.243  | -0.345 | -0.703   | <1E-04 |
| 7495  | 299084  | Hs.308709            | Data not found                                      |           | 0.601  | -0.132 | -4.543   | <1E-04 |
| 8042  | 248066  | Data not found       | Data not found                                      |           | -0.847 | -0.002 | 342.433  | <1E-04 |
| 8264  | 131377  | Hs.518123            | TRK-fused gene                                      | TFG       | -0.428 | -0.018 | 23.714   | <1E-04 |
| 8503  | 320696  | In multiple clusters | Data not found                                      |           | 1.046  | -0.125 | -8.388   | <1E-04 |
| 8504  | 357775  | Hs.438863            | Nuclear receptor subfamily 1, group H, member 3     | NR1H3     | 0.848  | -0.141 | -6.000   | <1E-04 |
| 8905  | 211829  | Hs.556795            | Data not found                                      |           | 0.381  | -0.008 | -46.755  | <1E-04 |
| 10344 | 48411   | Hs.446271            | Hypothetical gene supported by AK091718             | LOC401504 | 0.743  | 0.005  | 149.733  | <1E-04 |
| 10378 | 416017  | Hs.509523            | Menage a trois homolog 1, cyclin H assembly factor  | MNAT1     | -0.419 | 0.114  | -3.688   | <1E-04 |
| 10619 | 2229759 | Hs.88139             | Data not found                                      |           | -0.944 | -0.030 | 31.150   | <1E-04 |
| 10642 | 774069  | Hs.129634            | Cyclin-dependent kinase 2-interacting protein       | CINP      | 0.345  | -0.266 | -1.294   | <1E-04 |
| 10709 | 2262577 | Hs.69851             | Nucleolar protein family A, member 1                | NOLA1     | -3.505 | -0.280 | 12.512   | <1E-04 |
| 10905 | 123913  | Hs.560937            | Data not found                                      |           | 1.213  | -0.154 | -7.869   | <1E-04 |
| 10943 | 1987547 | Hs.128841            | CDNA FLJ41537 fis, clone BRTHA2017985               |           | -0.785 | 0.033  | -23.750  | <1E-04 |
| 10951 | 489919  | Hs.534359            | Data not found                                      |           | -0.778 | -0.194 | 4.006    | <1E-04 |
| 11006 | 198699  | Hs.89714             | Chemokine (C-X-C motif) ligand 5                    | CXCL5     | -0.733 | -0.074 | 9.956    | <1E-04 |
| 11015 | 1989328 | Hs.44898             | Transcribed locus                                   |           | -0.838 | -0.025 | 33.339   | <1E-04 |
| 11067 | 204295  | Hs.559465            | Transcribed locus                                   |           | -0.894 | 0.018  | -50.272  | <1E-04 |
| 11096 | 83458   | Hs.201667            | Aldo-keto reductase family 1, member D1             | AKR1D1    | -1.105 | -0.023 | 48.638   | <1E-04 |
| 11203 | 2404052 | Data not found       | Data not found                                      |           | -1.073 | -0.083 | 12.909   | <1E-04 |
| 11222 | 108369  | Data not found       | Data not found                                      |           | -0.992 | -0.064 | 15.573   | <1E-04 |
| 11276 | 1269464 | Hs.518129            | Data not found                                      |           | -1.147 | -0.104 | 10.993   | <1E-04 |
| 11294 | 446159  | Hs.100426            | Breast cancer metastasis suppressor 1               | BRMS1     | -1.303 | -0.088 | 14.840   | <1E-04 |
| 11393 | 2005398 | Hs.9641              | Data not found                                      |           | -0.876 | -0.058 | 15.121   | <1E-04 |
| 11447 | 2140125 | Hs.422662            | Vaccinia related kinase 1                           | VRK1      | -1.365 | -0.069 | 19.858   | <1E-04 |
| 11482 | 1714594 | Hs.536848            | Data not found                                      |           | -0.607 | 0.002  | -387.698 | <1E-04 |
| 11546 | 110550  | Data not found       | Data not found                                      |           | -0.742 | -0.008 | 94.090   | <1E-04 |

|       |         |           |                                                   |          |        |        |          |        |
|-------|---------|-----------|---------------------------------------------------|----------|--------|--------|----------|--------|
| 11660 | 811031  | Hs.304682 | Cystatin C                                        | CST3     | -0.639 | -0.010 | 66.582   | <1E-04 |
| 11812 | 741544  | Hs.520026 | Valyl-tRNA synthetase                             | VARS     | 1.952  | -0.032 | -60.714  | <1E-04 |
| 11843 | 2154486 | Hs.386567 | Guanylate binding protein 2, interferon-inducible | GBP2     | -1.333 | 0.051  | -25.886  | <1E-04 |
| 12095 | 2457201 | Hs.445482 | Transcribed locus                                 |          | -1.022 | -0.087 | 11.691   | <1E-04 |
| 12229 | 738939  | Hs.133444 | CDNA FLJ13497 fis, clone PLACE1004518             |          | -1.014 | -0.065 | 15.570   | <1E-04 |
| 12257 | 2188489 | Hs.193268 | Methylthioadenosine phosphorylase                 | MTAP     | -1.274 | -0.062 | 20.464   | <1E-04 |
| 12275 | 2186985 | Hs.489118 | Sterile alpha motif domain containing 9-like      | SAMD9L   | -1.193 | 0.050  | -24.002  | <1E-04 |
| 12311 | 2186859 | Hs.376208 | Lymphotoxin beta (TNF superfamily, member 3)      | LTB      | -0.903 | -0.002 | 442.956  | <1E-04 |
| 12337 | 2119039 | Hs.491869 | Transcribed locus                                 |          | -0.629 | 0.037  | -16.774  | <1E-04 |
| 12364 | 1690348 | Hs.494552 | Data not found                                    |          | -0.349 | -0.026 | 13.357   | <1E-04 |
| 12481 | 2255057 | Hs.2303   | Erythropoietin                                    | EPO      | -0.576 | -0.081 | 7.134    | <1E-04 |
| 12508 | 1732823 | Hs.143873 | S100 calcium binding protein A10                  | S100A10  | -0.865 | 0.015  | -56.091  | <1E-04 |
| 12586 | 742711  | Hs.517106 | CCAAT/enhancer binding protein (C/EBP), beta      | CEBPB    | 0.612  | -0.626 | -0.977   | <1E-04 |
| 12688 | 898255  | Hs.386684 | Abelson helper integration site 1                 | AHI1     | -1.095 | -0.059 | 18.498   | <1E-04 |
| 12706 | 942520  | Hs.187624 | Transcribed locus                                 |          | -1.057 | -0.050 | 21.118   | <1E-04 |
| 12715 | 301919  | Hs.129563 | Chromosome 17 open reading frame 59               | C17orf59 | -1.217 | -0.119 | 10.217   | <1E-04 |
| 12725 | 2208194 | Hs.461722 | Trafficking protein particle complex 2-like       | TRAPPC2L | -0.857 | 0.035  | -24.167  | <1E-04 |
| 12901 | 760039  | Hs.42217  | Integrin alpha FG-GAP repeat containing 1         | ITFG1    | -0.945 | -0.065 | 14.438   | <1E-04 |
| 12904 | 1682514 | Hs.124854 | Data not found                                    |          | -1.196 | -0.109 | 10.995   | <1E-04 |
| 12913 | 2305614 | Hs.407004 | Data not found                                    |          | -0.687 | -0.017 | 39.595   | <1E-04 |
| 12914 | 221223  | Hs.164060 | Growth factor receptor-bound protein 10           | GRB10    | -1.242 | -0.116 | 10.679   | <1E-04 |
| 12931 | 2069130 | Hs.476636 | Transcribed locus                                 |          | -1.093 | -0.163 | 6.693    | <1E-04 |
| 12934 | 428281  | Hs.505601 | SEC14-like 3 ( <i>S. cerevisiae</i> )             | SEC14L3  | -0.627 | 0.013  | -46.538  | <1E-04 |
| 13102 | 1390584 | Hs.507498 | Mitochondrial intermediate peptidase              | MIPEP    | -0.418 | 0.005  | -88.376  | <1E-04 |
| 13157 | 2219539 | Hs.10319  | CDNA FLJ37609 fis, clone BRCOC2011010             |          | -1.212 | 0.007  | -171.278 | <1E-04 |
| 13427 | 2222735 | Hs.107410 | Transcribed locus                                 |          | -0.386 | 0.116  | -3.336   | <1E-04 |
| 13696 | 1736295 | Hs.479954 | Methylenetetrahydrofolate dehydrogenase 2-like    | MTHFD2L  | -0.811 | -0.073 | 11.118   | <1E-04 |
| 13791 | 726405  | Hs.510635 | Immunoglobulin heavy constant mu                  | IGHG1    | 2.049  | -0.020 | -104.834 | <1E-04 |
